# Supplementary material for: Prognostic value of tumor suppressors in osteosarcoma before and after neoadjuvant chemotherapy
Source: Springer Nature journal article supplement (doi:10.1186/s12885-015-1397-4), 2015-05-08
Supplement: MOESM1 [file 9744576]

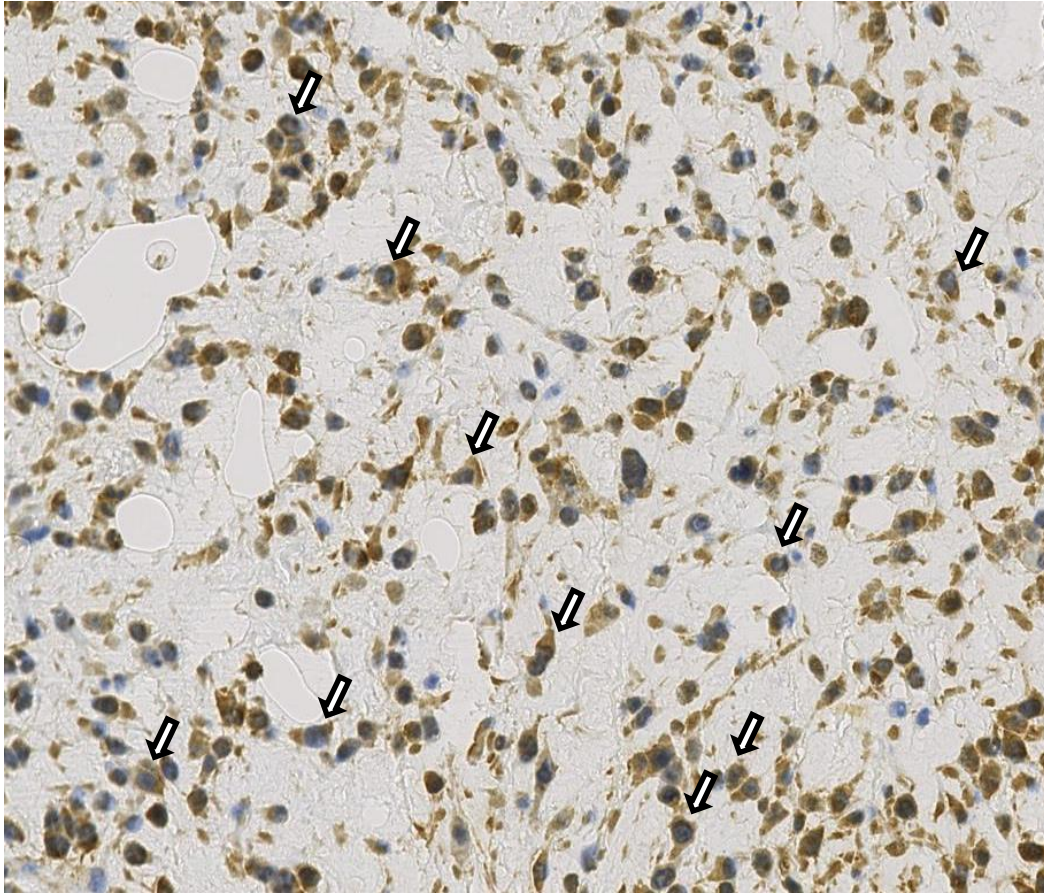

**Additional file 1. Positive, cytoplasmic only P16 immunostaining.** This figure displays an immunostaining of P16 which is solely present in the cytoplasm of tumor cells (arrows point at representative cancer cells). The blue color of all nuclei is never fully covered with brown DAB reagent, showing the extranuclear localization of the P16 staining.
