# Supplementary material for: Prognostic value of tumor suppressors in osteosarcoma before and after neoadjuvant chemotherapy
Source: Springer Nature journal article supplement (doi:10.1186/s12885-015-1397-4), 2015-05-08
Supplement: MOESM2 [file 9744576]

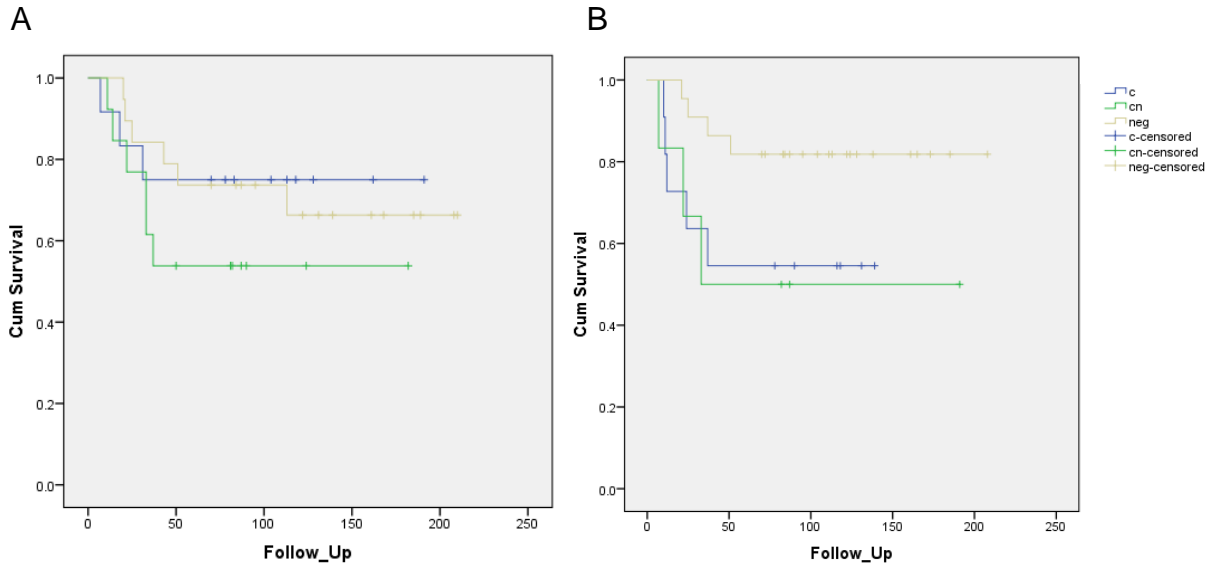

**Additional file 2. Kaplan- Meier survival analysis of samples grouped according to subcellular localization of P16.** P16 positive samples were grouped according to the subcellular localization of P16, yielding “cytoplasmic and nuclear” (cn) P16 as well as “cytoplasmic only” (c) P16. **(A)** Kaplan-Meier plot showing no difference in survival rates of BXs stratified according to c or cn subcellular localizations of P16 ( $P = 0.358$ ). **(B)** Kaplan-Meier survival analysis using RXs yielded similar survival rates of cn and c P16 ( $P = 0.845$ ). In contrast, cnP16 and cP16 showed worse survival rates when compared to P16 negative samples ( $P = 0.067$  and  $P = 0.059$ , respectively). Abbreviations: BX, biopsy; c, cytoplasmic only; cn, cytoplasmic and nuclear; RX, resection;
