# Supplementary material for: Prognostic value of tumor suppressors in osteosarcoma before and after neoadjuvant chemotherapy
Source: Springer Nature journal article supplement (doi:10.1186/s12885-015-1397-4), 2015-05-08
Supplement: MOESM3 [file 9744576]

**Additional file 3. Correlations between Ki67 IHC and IHC of other biomarkers**

| <b>BX</b> |        |     |     | <b>RX</b> |        |     |     |
|-----------|--------|-----|-----|-----------|--------|-----|-----|
| Ki67      | Maspin | neg | pos | P < 0.001 | Maspin | neg | pos |
|           | neg    | 11  | 5   |           |        | 12  | 2   |
|           | pos    | 1   | 21  |           |        | 2   | 6   |
| Ki67      | PTEN   | neg | pos | P = 0.018 | PTEN   | neg | pos |
|           | neg    | 10  | 6   |           |        | 11  | 2   |
|           | pos    | 5   | 19  |           |        | 2   | 4   |
| Ki67      | P53    | neg | pos | P = 1.000 | P53    | neg | pos |
|           | neg    | 15  | 4   |           |        | 11  | 6   |
|           | pos    | 20  | 4   |           |        | 4   | 4   |
| Ki67      | P16    | neg | pos | P = 0.050 | P16    | neg | pos |
|           | neg    | 10  | 7   |           |        | 8   | 7   |
|           | pos    | 6   | 18  |           |        | 1   | 7   |
| Ki67      | BMI1   | neg | pos | P = 0.001 | BMI1   | neg | pos |
|           | neg    | 17  | 0   |           |        | 11  | 2   |
|           | pos    | 12  | 11  |           |        | 8   | 0   |

Abbreviations: IHC, immunohistochemistry; neg, negative; pos, positive.
